# Supplementary figures and images for: One‐vector CRISPR/Cas9 genome engineering of the industrial fungus Ashbya gossypii
Source: PubMed Central journal article supplement — Microb Biotechnol. 2019 May 5;12(6):1293–301. doi: 10.1111/1751-7915.13425 (PMC6801137; doi:10.1111/1751-7915.13425), 2019-05-05

Figure S1

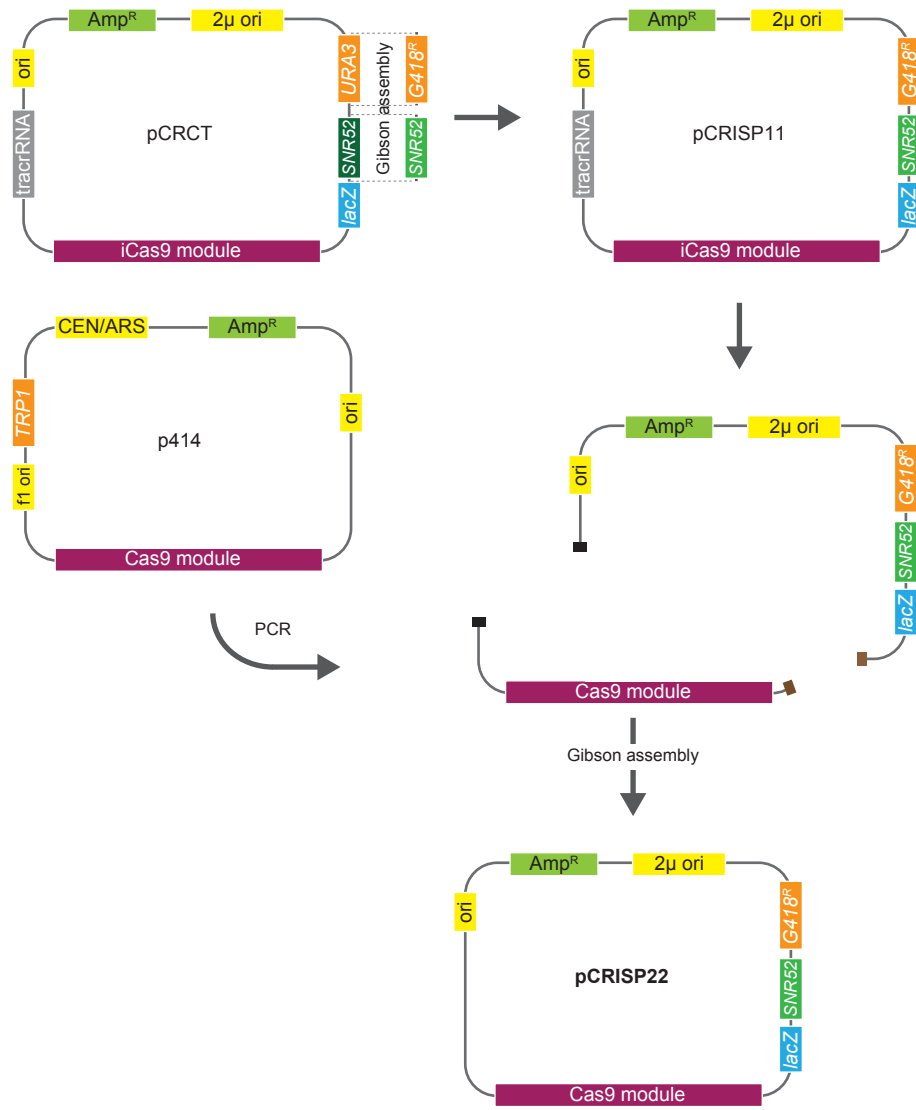

Supplement: MBT2-12-1293-s001.pdf [file MBT2-12-1293-s001.pdf]

Figure S2

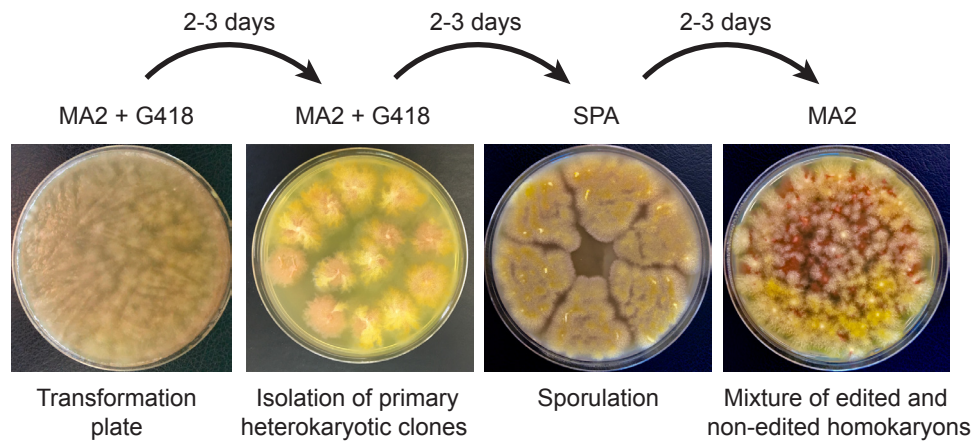

Supplement: MBT2-12-1293-s002.pdf [file MBT2-12-1293-s002.pdf]
